# Supplementary material
Source: publisher figshare collection journal article supplement (https://karger.figshare.com/ndownloader/files/14721431)
Supplement: Supplementary file 1 [file 14721431]

**Table S: The concentration of amino acids in DMEM and MEM**

| Amino Acids | DMEM  (mg/L) | MEM  (mg/L) |
| --- | --- | --- |
| L-Cystine | 62.6 | 31.0 |
| L-Glutamine | 584.0 | 292.0 |
| L-Histidine | 42.0 | 42.0 |
| L-Isoleucine | 105.0 | 52.0 |
| L-Leucine | 105.0 | 52.0 |
| L-Lysine | 146.0 | 73.0 |
| L-Methionine | 30.0 | 15.0 |
| L-Phenylalanine | 66.0 | 32.0 |
| L-Threonine | 95.0 | 48.0 |
| L-Tryptophan | 16.0 | 10.0 |
| L-Tyrosine | 103.8 | 52.0 |
| L-Valine | 94.0 | 46.0 |
| L-Arginine | 84.0 | 126.0 |
